# Supplementary material for: Phenolics and Terpenoids Profiling in Diverse Loquat Fruit Varieties and Systematic Assessment of Their Mitigation of Alcohol-Induced Oxidative Stress
Source: MDPI journal article supplement (doi:10.3390/antiox12101795), 2023-09-23
Supplement: s1 [file s1]

**Table S1** RT-PCR Primers

| Gene           | Forward Primer (5' to 3') | Reverse Primer (3' to 5') |
|----------------|---------------------------|---------------------------|
| <i>Nrf2</i>    | TCAGCAGCATCCTCTCCAC       | GGTCACAGCCTTCAATAGTCC     |
| <i>Keap1</i>   | GGCGGCAGAAGAAGTCATC       | TGGTGGTGGGAGTTCAAGG       |
| <i>Cul3</i>    | TCCCACCAGCACCAAGAC        | CACCGCCAACACCAACC         |
| <i>β-Actin</i> | CGACAGCAGTTGGTTGGAG       | GGGAGGGTGAGGGACTTC        |

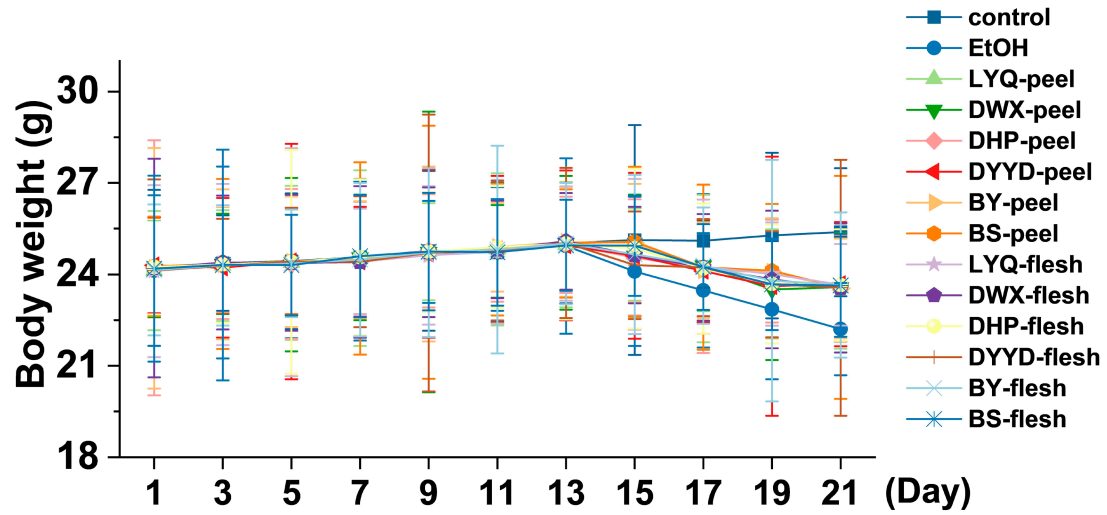

**Figure S1** Mouse body weight
